# Supplementary material for: Design of thiol–lithium ion interaction in metal–organic framework for high-performance quasi-solid lithium metal batteries
Source: Royal Society of Chemistry journal article supplement (doi:10.1039/d0dt03336g), 2021-01-01
Supplement: d0dt03336g1.pdf [file d0dt03336g1.pdf]

## Supporting Information

### Design of Thiol-Lithium Ion Interaction in Metal-Organic Framework for High-Performance Quasi-Solid Lithium Metal Batteries

*Qi Zhang,<sup>† a,b</sup> Yingbo Xiao,<sup>† a</sup> Qi Li,<sup>a</sup> Jia Wang,<sup>a</sup> Sijia Guo,<sup>a</sup> Xin Li,<sup>a</sup> Yuan Ouyang,<sup>a</sup> Qinghan Zeng,<sup>a</sup> Wenchao He<sup>a</sup> and Shaoming Huang<sup>a,b,\*</sup>*

<sup>a</sup>Guangzhou Key Laboratory of Low-Dimensional Materials and Energy Storage Devices, School of Materials and Energy, Guangdong University of Technology, Guangzhou, 510006, China

<sup>b</sup>Synergy Innovation Institute of GDUT, Heyuan, 517000, China.

<sup>†</sup> These authors contributed equally.

\*Corresponding author: E-mail: [smhuang@gdut.edu.cn](mailto:smhuang@gdut.edu.cn)

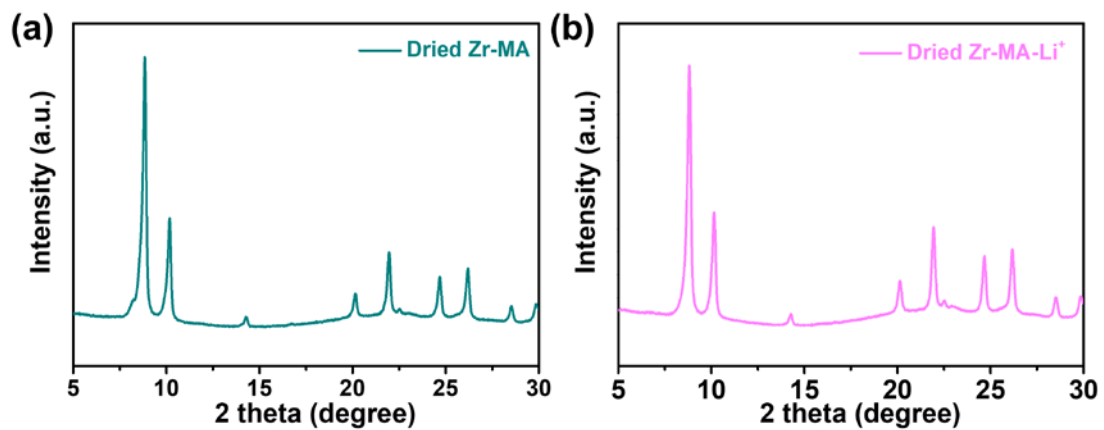

**Fig. S1** The XRD patterns of dried Zr-MA (a) and dried Zr-MA-Li<sup>+</sup> (b).

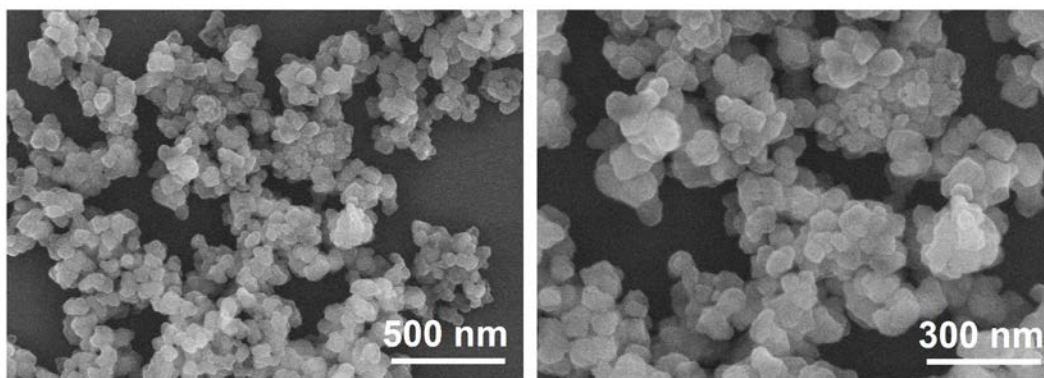

**Fig. S2** SEM images for Zr-MA-Li<sup>+</sup>.

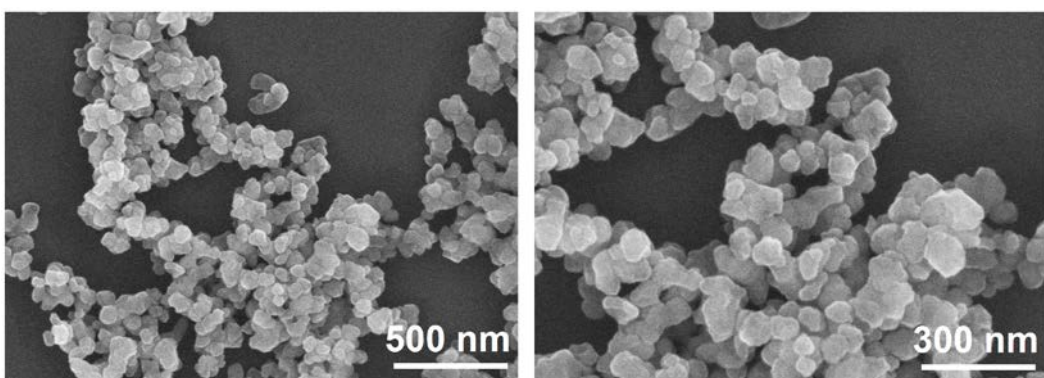

**Fig. S3** SEM images for Zr-MA-Na<sup>+</sup>.

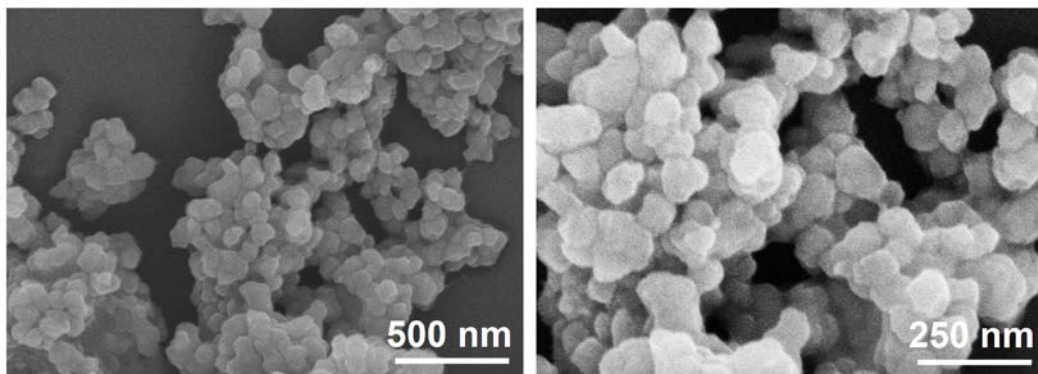

**Fig. S4** SEM images for Zr-MA-K<sup>+</sup>.

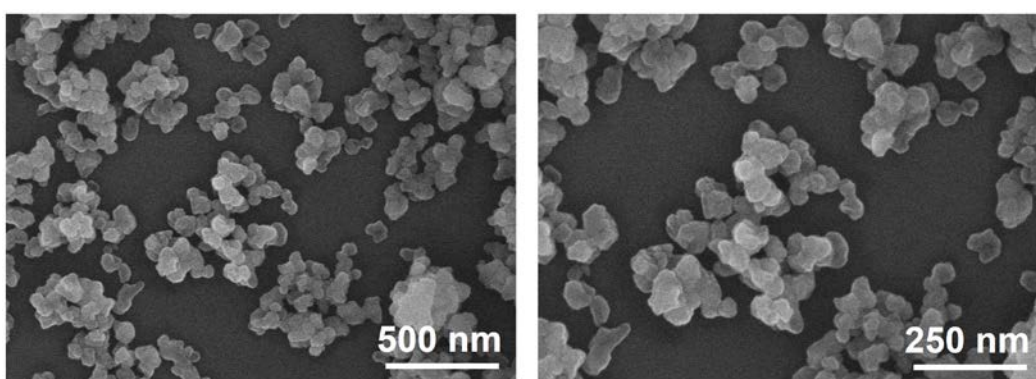

**Fig. S5** SEM images for Zr-MA-Zn<sup>2+</sup>.

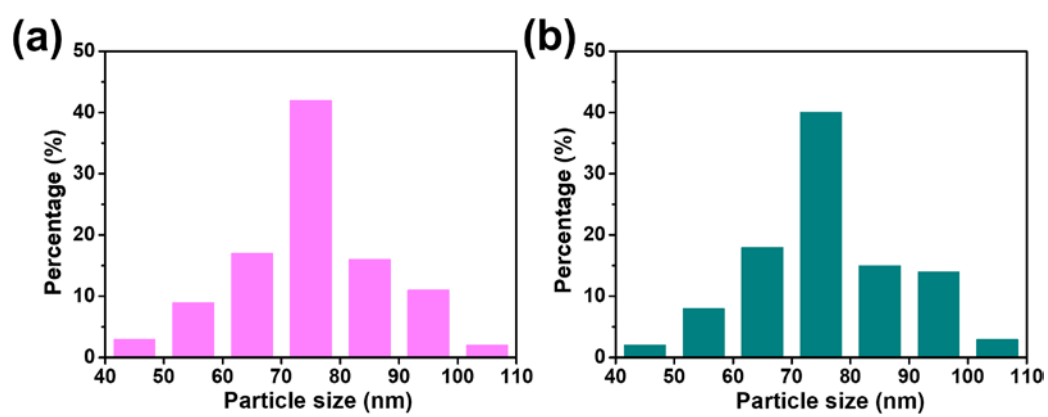

**Fig. S6** Particle size distribution of Zr-MA (a) and Zr-MA-Li<sup>+</sup> (b).

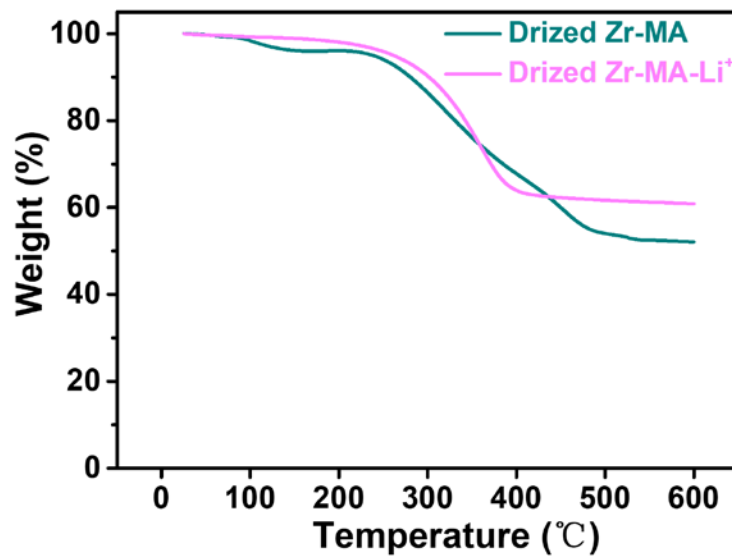

**Fig. S7** The TGA curves of dried Zr-MA and dried Zr-MA-Li<sup>+</sup>.

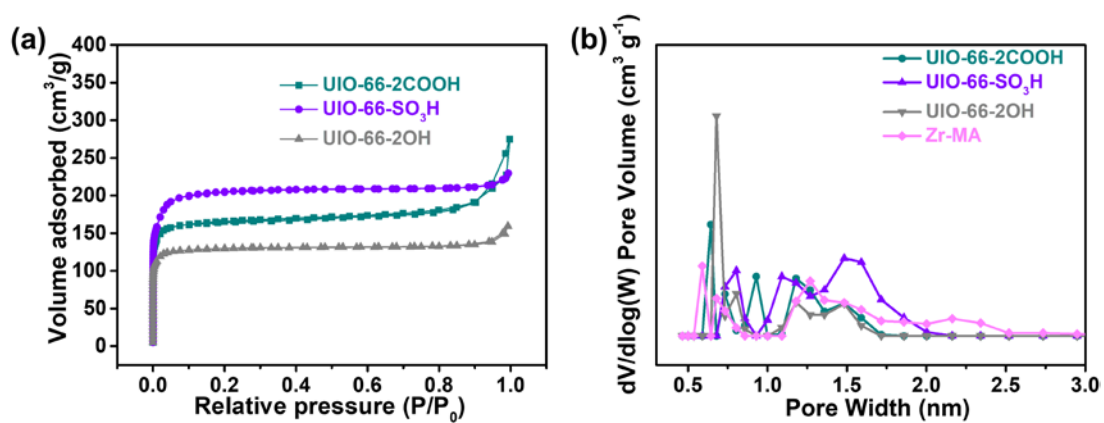

**Fig. S8** (a) Nitrogen adsorption-desorption isotherms, and (b) corresponding pore size distribution of UIO-66-2COOH, UIO-66-SO<sub>3</sub>H, UIO-66-2OH and Zr-MA.

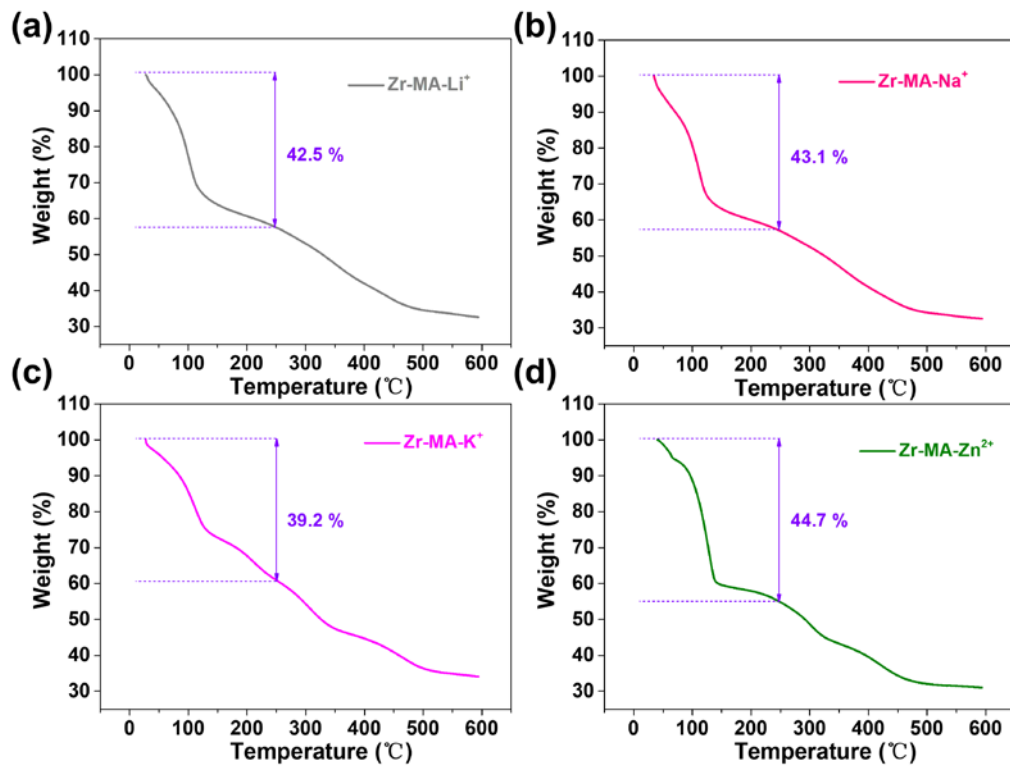

**Fig. S9** The TGA curves of Zr-MA-Li<sup>+</sup> (a), Zr-MA-Na<sup>+</sup> (b), Zr-MA-K<sup>+</sup> (c) and Zr-MA-Zn<sup>2+</sup> (d).

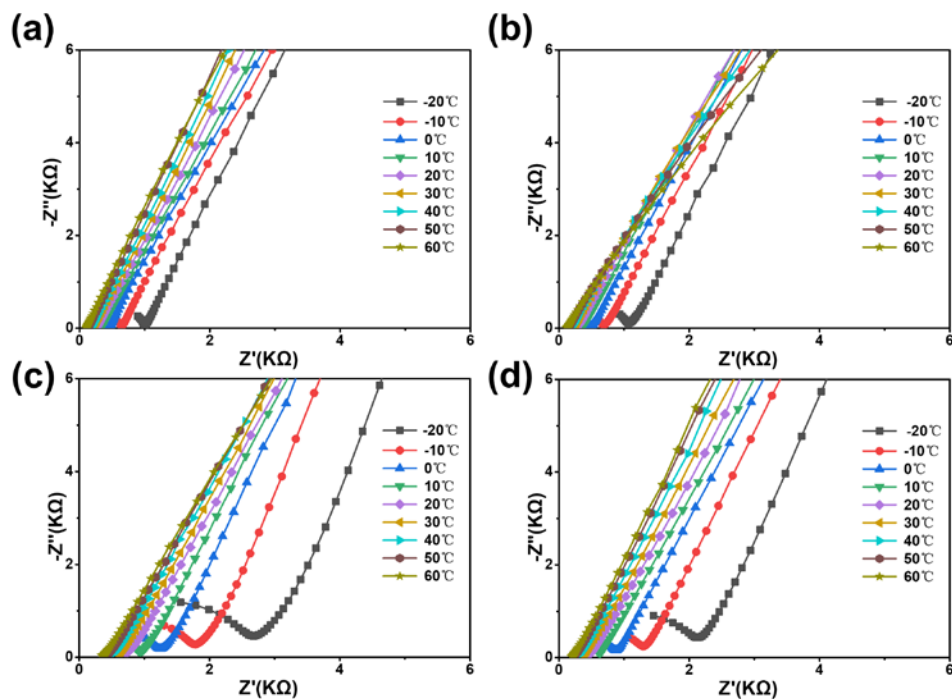

**Fig. S10** EIS within frequency of  $1 \times 10^{-5}$  Hz to 10 Hz of (a) Zr-MA-Li<sup>+</sup>, (b) Zr-MA-Na<sup>+</sup>, (c) Zr-MA-K<sup>+</sup>, and (d) Zr-MA-Zn<sup>2+</sup> at temperatures from -20 °C to 60 °C.

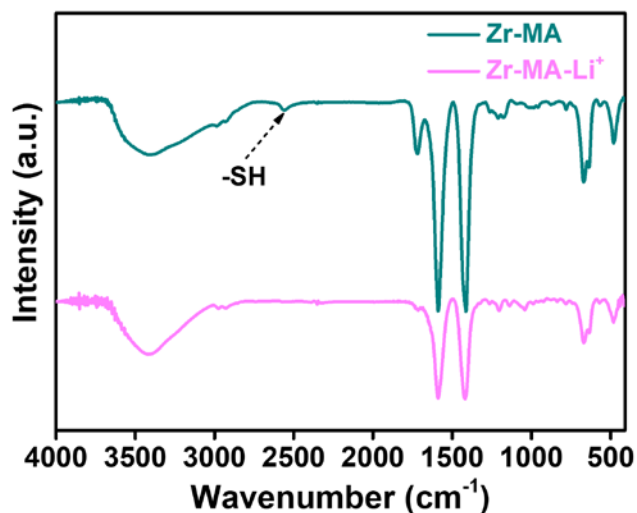

**Fig. S11** FT-IR spectra of Zr-MA and Zr-MA-Li<sup>+</sup>.

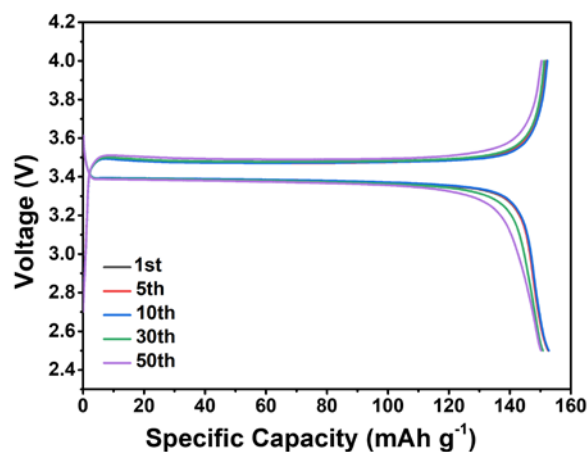

**Fig. S12** The charge-discharge profiles of Li|SE-Zr-MA-Li<sup>+</sup>|LiFePO<sub>4</sub> batteries under 0.2 C.

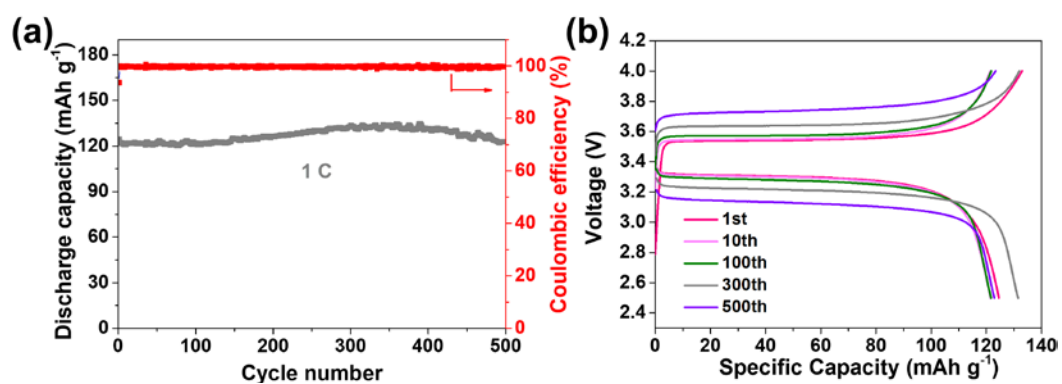

**Fig. S13** (a) The cycle performance with Coulombic efficiency and (b) charge-discharge profiles of Li|SE-Zr-MA-Li<sup>+</sup>|LiFePO<sub>4</sub> batteries at 1 C.

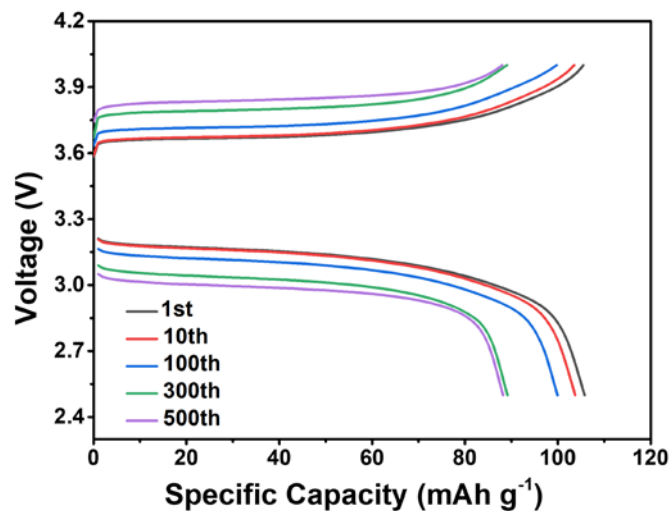

**Fig. S14** The charge-discharge profiles of Li|SE-Zr-MA-Li<sup>+</sup>|LiFePO<sub>4</sub> batteries under 2 C.

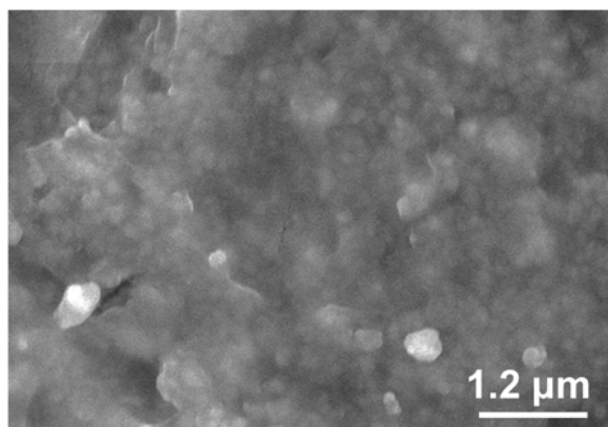

**Fig. S15** SEM of SE-Zr-MA-Li<sup>+</sup> after long-cycle cycling.

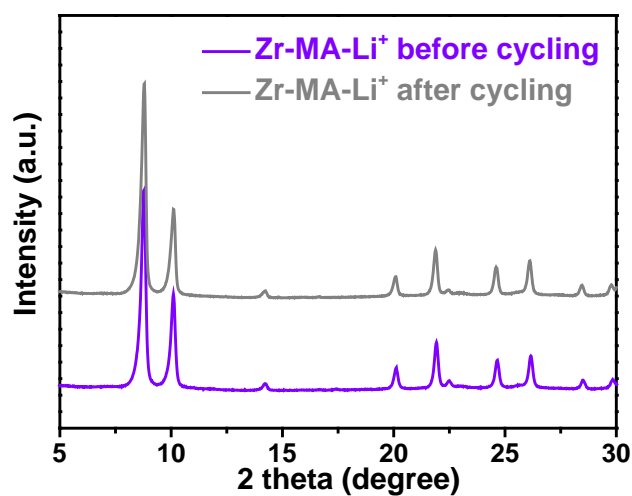

**Fig. S16** PXRD of Zr-MA-Li<sup>+</sup> before and after long-cycle cycling.

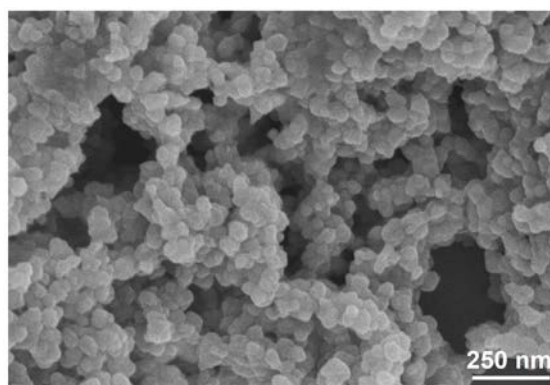

**Fig. S17** SEM of Zr-MA-Li<sup>+</sup> after long-cycle cycling.

**Tab. S1** Elemental analysis results of Zr-MA.

|       | Calculated |      |     |      |      | Found |      |      |      |
|-------|------------|------|-----|------|------|-------|------|------|------|
|       | Zr%        | C%   | H%  | O%   | S%   | C%    | H%   | O%   | S%   |
| Zr-MA | 34.8       | 18.4 | 1.8 | 32.7 | 12.3 | 20.3  | 2.79 | 28.5 | 12.2 |

**Tab. S2** The comparison of pKa for thiophenol, phenol, benzenesulfonic acid, and benzoic acid.

|     | Thiophenol | Phenol | Benzenesulfonic acid | Benzoic acid |
|-----|------------|--------|----------------------|--------------|
| pKa | 10.2       | 9.95   | 4.19                 | 4.21         |

**Tab. S3** The ion conductivities of Zr-MA-Li<sup>+</sup>, Zr-MA-Na<sup>+</sup>, Zr-MA-K<sup>+</sup>, Zr-MA-Zn<sup>2+</sup> at different temperatures.

| Samples                | Ionic conductivity ( $\times 10^{-4}$ S cm <sup>-1</sup> ) |       |      |      |      |      |      |      |      |
|------------------------|------------------------------------------------------------|-------|------|------|------|------|------|------|------|
|                        | -20°C                                                      | -10°C | 0°C  | 10°C | 20°C | 30°C | 40°C | 50°C | 60°C |
| Zr-MA-Li <sup>+</sup>  | 1.78                                                       | 2.78  | 3.97 | 5.29 | 6.92 | 8.66 | 10.8 | 13.7 | 17.4 |
| Zr-MA-Na <sup>+</sup>  | 1.52                                                       | 2.36  | 3.36 | 4.57 | 6.01 | 7.69 | 9.75 | 12.1 | 14.3 |
| Zr-MA-K <sup>+</sup>   | 0.65                                                       | 1.00  | 1.44 | 1.89 | 2.42 | 2.89 | 3.43 | 4.08 | 4.98 |
| Zr-MA-Zn <sup>2+</sup> | 0.84                                                       | 1.13  | 2.03 | 2.83 | 3.82 | 4.90 | 6.25 | 7.75 | 9.28 |



**Tab. S4** Comparison of electrochemical performances of LiFePO<sub>4</sub>|Li cells with MOFs based on solid state electrolytes.

| Electrolyte                     | Cycle performance (mAh g <sup>-1</sup> )                                                  | Rate performance (mAh g <sup>-1</sup> )                        | Ref.      |
|---------------------------------|-------------------------------------------------------------------------------------------|----------------------------------------------------------------|-----------|
| LPC@UM                          | about 94 (1 C, 500 cycles, 25 °C)                                                         | 146 (0.2 C, 25 °C)<br>106 (2 C, 25 °C)                         | 1         |
| Li-IL@MOF                       | 132 (1 C, 100 cycles, 25 °C)<br>(LiFePO <sub>4</sub> loading of ≈25 mg cm <sup>-2</sup> ) | 68 (0.05 C, -20 °C)<br>93 (0.5 C, 25 °C)<br>143 (0.5 C, 80 °C) | 2         |
| ILE@MOF                         | 151 (0.1 C, 60 cycles, 60 °C)                                                             | -                                                              | 3         |
| P@CMOF                          | about 91.5 (1 C, 60 cycles, 60 °C)                                                        | 126 (0.5 C, 60 °C)<br>106 (1 C, 60 °C)<br>67.4 (5 C, 60 °C)    | 4         |
| MOF-688                         | 120 (~0.2 C, 200 cycles)                                                                  | -                                                              | 5         |
| PL/UiOLiTFSI                    | 147.4 (0.2 C, 100 cycles)<br>132 (1 C, 500 cycles)                                        | 145 (0.2 C, RT)<br>136 (1 C, RT)<br>109 (3 C, RT)              | 6         |
| Li-IL@UIO-66-2CO <sub>2</sub> H | 148.5 (0.1 C, 100 cycles)<br>115 (2 C, 500 cycles)                                        | 150 (0.1 C, RT)<br>145 (0.5 C, RT)<br>135 (1 C, RT)            | 7         |
| SE-PMOF                         | 145 (0.2 C, 100 cycles)<br>127 (1 C, 500 cycles)                                          | 153 (0.2 C, RT)<br>150 (0.5 C, RT)<br>144 (1 C, RT)            | 8         |
| UiO-66-2COOH/PVDF-HFP           | -                                                                                         | 131 (0.2 C, RT)<br>112 (0.5 C, RT)<br>90 (2 C, RT)             | 7         |
| UiO-66-2OH/PVDF-HFP             | -                                                                                         | 137 (0.2 C, RT)<br>132 (0.5 C, RT)<br>70 (2 C, RT)             | 8         |
| Zr-MA-Li <sup>+</sup>           | 120 (1 C, 500 cycles)<br>90 (2 C, 700 cycles)                                             | 153 (0.2 C)<br>135 (0.5 C, RT)<br>115 (2 C, RT)                | This work |

## References

- 1 L. Shen, H. B. Wu, F. Liu, J. L. Brosmer, G. Shen, X. Wang, J. I. Zink, Q. Xiao, M. Cai, G. Wang, Y. Lu and B. Dunn, *Adv. Mater.*, 2018, **30**, 1707476.
- 2 Z. Wang, R. Tan, H. Wang, L. Yang, J. Hu, H. Chen and F. Pan, *Adv. Mater.*, 2018, **30**, 1704436.
- 3 N. Chen, Y. Li, Y. Dai, W. Qu, Y. Xing, Y. Ye, Z. Wen, C. Guo, F. Wu and R. Chen, *J. Mater. Chem. A*, 2019, **7**, 9530-9536.
- 4 H. Huo, B. Wu, T. Zhang, X. Zheng, L. Ge, T. Xu, X. Guo and X. Sun, *Energy Storage Mater.*, 2019, **18**, 59-67.
- 5 W. Xu, X. Pei, C. S. Diercks, H. Lyu, Z. Ji and O. M. Yaghi, *J. Am. Chem. Soc.*, 2019, **141**, 17522-17526.
- 6 F. Zhu, H. Bao, X. Wu, Y. Tao, C. Qin, Z. Su and Z. Kang, *ACS Appl. Mater. Interfaces*, 2019, **11**, 43206-43213.
- 7 Q. Zhang, D. Li, J. Wang, S. Guo, W. Zhang, D. Chen, Q. Li, X. Rui, L. Gan and S. Huang, *Nanoscale*, 2020, **12**, 6976-6982.
- 8 Q. Zhang, B. Liu, J. Wang, Q. Li, D. Li, S. Guo, Y. Xiao, Q. Zeng, W. He, M. Zheng, Y. Ma and S. Huang, *ACS Energy Lett.*, 2020, **5**, 2919-2926.
